# Supplementary material for: The epithelial-to-mesenchymal transition induced by tumor-associated macrophages confers chemoresistance in peritoneally disseminated pancreatic cancer
Source: Springer Nature journal article supplement (doi:10.1186/s13046-018-0981-2), 2018-12-01
Supplement: MOESM1 [file 16332956]

**Panc-1: 5FU**

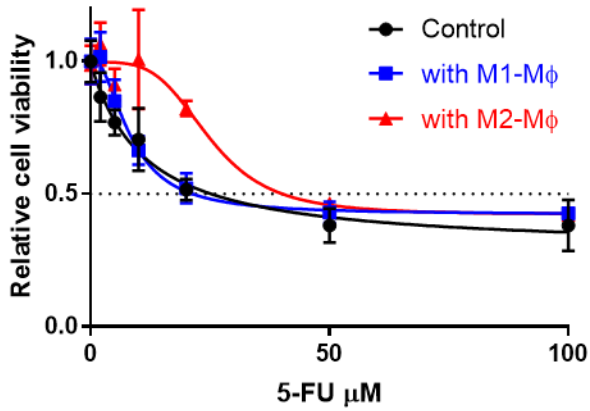

|      | Control | With M1 Mφ | With M2 Mφ |
|------|---------|------------|------------|
| IC50 | 11.1    | 8.3        | 25.0       |

Control vs with M1-Mφ:  $p < 0.1288$   
 Control vs with M2-Mφ:  $p < 0.0001$   
 M1-Mφ vs with M2-Mφ:  $p < 0.0001$

**BxPC-3: 5FU**

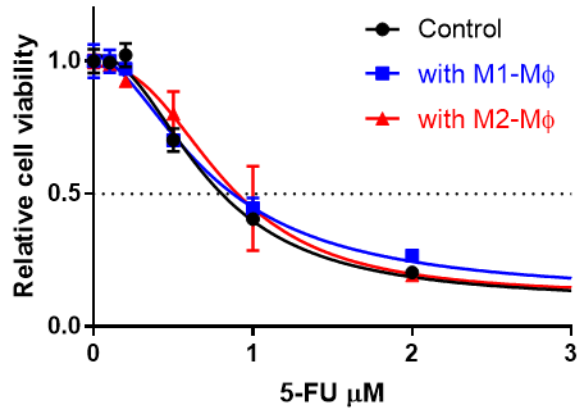

|      | Control | With M1 Mφ | With M2 Mφ |
|------|---------|------------|------------|
| IC50 | 0.71    | 0.74       | 0.83       |

Control vs with M1-Mφ:  $p < 0.1120$   
 Control vs with M2-Mφ:  $p < 0.3283$   
 M1-Mφ vs with M2-Mφ:  $p < 0.2773$
