# Supplementary material for: The epithelial-to-mesenchymal transition induced by tumor-associated macrophages confers chemoresistance in peritoneally disseminated pancreatic cancer
Source: Springer Nature journal article supplement (doi:10.1186/s13046-018-0981-2), 2018-12-01

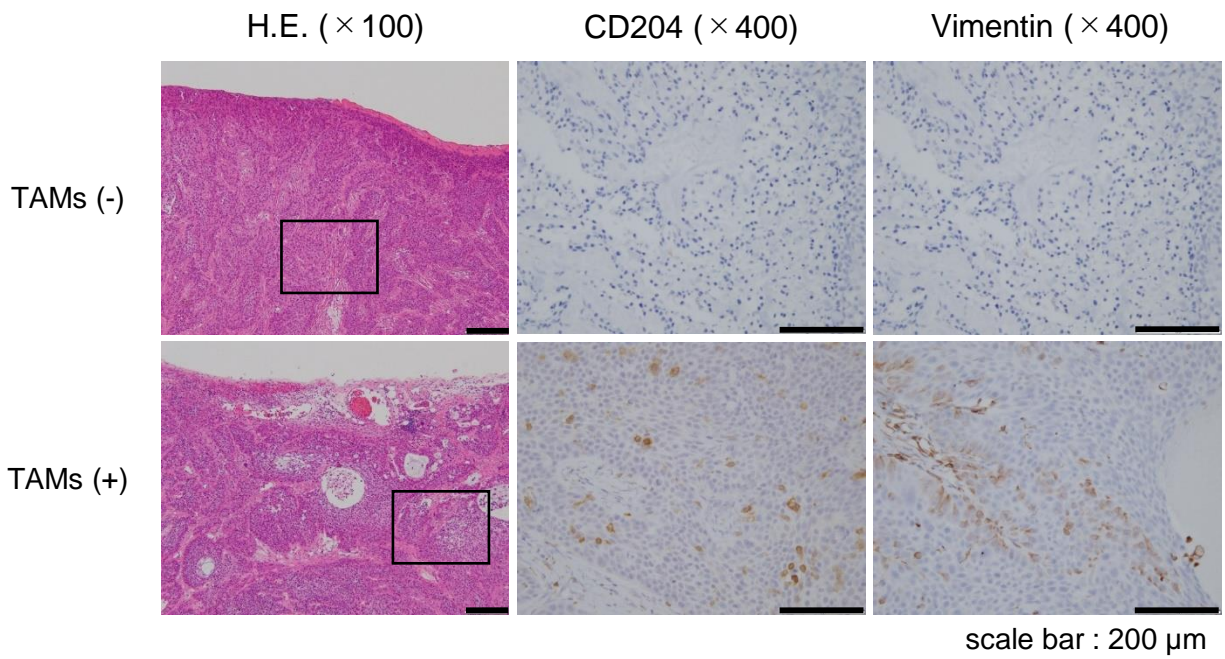

Supplement: MOESM2 [file 16332956]
