# Supplementary material for: The epithelial-to-mesenchymal transition induced by tumor-associated macrophages confers chemoresistance in peritoneally disseminated pancreatic cancer
Source: Springer Nature journal article supplement (doi:10.1186/s13046-018-0981-2), 2018-12-01

**a**

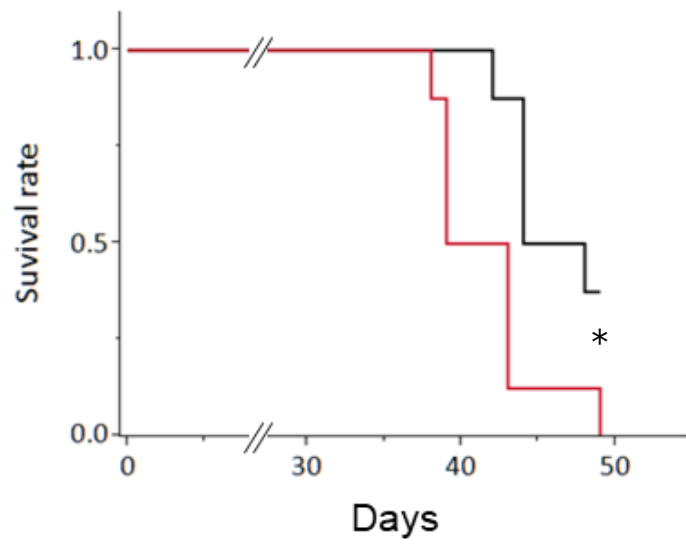

**b**

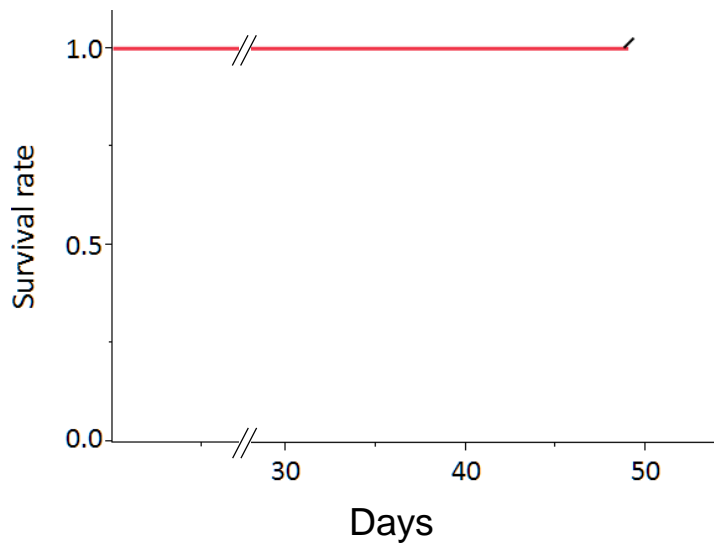

Supplement: MOESM3 [file 16332956]
